# Supplementary material for: A Cross-Sectional Study of the Satisfaction with, Adherence to, and Perspectives toward COVID-19 Preventive Measures among Public Health Students in Jazan, Saudi Arabia
Source: MDPI journal article supplement (doi:10.3390/ijerph19020802), 2022-01-12
Supplement: s1 [file s1]

A cross-sectional study of the satisfaction with, adherence to, and perspectives toward COVID-19 preventive measures among public health students in Jazan, Saudi Arabia  
Mohammed J. Almalki

### ***Supplementary Material***

[File S1: data collection questionnaire, SAP COVID-19 preventive measures](#)

A cross-sectional study of the satisfaction with, adherence to, and perspectives toward COVID-19 preventive measures among public health students in Jazan, Saudi Arabia  
Mohammed J. Almalki

## Data Collection Questionnaire

(Satisfaction with, adherence to, and perspectives toward COVID-19 preventive measures)

Dear Public Health Student, Jazan University, Saudi Arabia

This study aims to assess the satisfaction with, adherence to, and perspectives toward COVID-19 preventive measures among public health students in Jazan University, Saudi Arabia. Filling out the questionnaire takes only about seven minutes. Participation in this study is voluntary anonymous, and you can quit this questionnaire at any time. Collected data will be used for research purposes only according to the requirement of the Research Ethics Committee. Your participation is appreciated. Thank you.

For Further Information, you may contact:

Mohammed Almalki  
College of Public Health and Tropical Medicine  
Jazan University  
mjalmalki@jazanu.edu.sa

Thank you very much.

A cross-sectional study of the satisfaction with, adherence to, and perspectives toward COVID-19 preventive measures among public health students in Jazan, Saudi Arabia  
Mohammed J. Almalki

**1. Are you a public health student at Jazan University, Saudi Arabia?**

- 1 ☐ Yes (please continue to the next question)
- 2 ☐ No (you may stop here, thank you)

**2. Do you agree to participate in this study?**

- 1 ☐ Yes (please start the questionnaire in the next section)
- 2 ☐ No (you may stop here, thank you)

Answering all questions will enable us to analyze the data of this questionnaire. Please ensure your full participation. Thank you.

**PART ONE: Background Information**

**3. Your gender?**

- 1 ☐ Male
- 2 ☐ Female

**4. Your age? (\_\_\_\_\_)**

**5. Discipline of study?**

- 1 ☐ Epidemiology
- 2 ☐ Health education & promotion
- 3 ☐ Health informatics

**6. Educational level?**

- 1 ☐ Year 2 students (Levels 3 & 4)
- 2 ☐ Year 3 students (Levels 5 & 6)
- 3 ☐ Final year students (Levels 7 & 8)

**7. Have you contracted COVID-19?**

- 1 ☐ Yes
- 2 ☐ No

**PART Two: Perspective of organization and dealing, perspective of preventive measures, personal adherence, and general satisfaction with the COVID-19 preventive measures**

(Responding to the following questions, please consider your college performance during the current Mid-Term Exam.)

**8. Participants' perspective of organization and dealing:**

|                                                                                                                                         | Strongly Agree           | Agree                    | Neutral                  | Disagree                 | Strongly Disagree        |
|-----------------------------------------------------------------------------------------------------------------------------------------|--------------------------|--------------------------|--------------------------|--------------------------|--------------------------|
| There are health measures to screen people for COVID-19 symptoms before entering the college facilities.                                | <input type="checkbox"/> |
| Students are received in an organized manner.                                                                                           | <input type="checkbox"/> |
| If there is a problem or concern related to COVID-19, I know exactly how to act and to whom within the college I can refer for support. | <input type="checkbox"/> |

**9. Participants' perspective of the COVID-19 preventive measures implemented by the college:**

|                                                                                                               | Strongly Agree           | Agree                    | Neutral                  | Disagree                 | Strongly Disagree        |
|---------------------------------------------------------------------------------------------------------------|--------------------------|--------------------------|--------------------------|--------------------------|--------------------------|
| Employees use protective measures such as face masks.                                                         | <input type="checkbox"/> |
| Students use protective measures such as face masks.                                                          | <input type="checkbox"/> |
| Everyone's temperature is checked immediately before entering the buildings.                                  | <input type="checkbox"/> |
| Everyone is required to use hand sanitizer and face masks before entering the buildings.                      | <input type="checkbox"/> |
| The safe distancing (2 meters) between people is observed during the screening process and inside the campus. | <input type="checkbox"/> |
| There is a designated location to isolate suspected COVID-19.                                                 | <input type="checkbox"/> |
| The college provides personal protective equipment for students and others, as needed.                        | <input type="checkbox"/> |
| I have received the information and instructions related to COVID-19 preventive measures from the college.    | <input type="checkbox"/> |

**10. What are the best COVID-19 health education materials provided by the college?**

---



---



---



---

**11. Personal adherence to the COVID-19 preventive measures on campus:**

|                                                           | Strongly Agree           | Agree                    | Neutral                  | Disagree                 | Strongly Disagree        |
|-----------------------------------------------------------|--------------------------|--------------------------|--------------------------|--------------------------|--------------------------|
| I wear personal protective equipment such as a face mask. | <input type="checkbox"/> |
| I wash/sanitize my hands as recommended.                  | <input type="checkbox"/> |
| I adhere to the social distancing measures.               | <input type="checkbox"/> |

**12. In your opinion, what are the main reasons that prevent students from adhering to the COVID-19 preventive measures on campus?**

---



---



---



---

**13. General satisfaction with the COVID-19 preventive measures:**

|                                                                                                                      | Strongly Agree           | Agree                    | Neutral                  | Disagree                 | Strongly Disagree        |
|----------------------------------------------------------------------------------------------------------------------|--------------------------|--------------------------|--------------------------|--------------------------|--------------------------|
| I am generally satisfied with the COVID-19 preventive measures implemented in the college during the mid-term exams. | <input type="checkbox"/> |

**14. Please list the three most important reasons for your satisfaction/dissatisfaction with the COVID-19 preventive measures implemented in the college.**

---



---



---



---

**15. In the space below, please write any additional notes or information that you believe will enhance the study results.**

---



---



---



---

THANK YOU FOR COMPLETING THIS SURVEY.

دراسة مسحية مقطعية حول الرضا عن التدابير الوقائية لكوفيد-19 والالتزام بها ووجهات النظر تجاهها بين طلاب الصحة العامة في جازان ، المملكة العربية السعودية

## أستبانة جمع البيانات

(الرضا عن التدابير الوقائية لكوفيد-19 والالتزام بها ووجهات النظر تجاهها)

عزيزي طالب كلية الصحة العامة بجامعة جازان، المملكة العربية السعودية

تهدف هذه الدراسة إلى تقييم الرضا عن التدابير الوقائية لكوفيد-19 ومدى الالتزام بها ووجهات النظر تجاهها بين طلاب الصحة العامة في جامعة جازان، المملكة العربية السعودية. يستغرق ملء الاستبانة حوالي سبع دقائق فقط. المشاركة في هذه الدراسة طوعية ولا تتطلب معلومات شخصية، ويمكنك التوقف عن ملء هذه الاستبانة في أي وقت. ستستخدم البيانات التي يتم جمعها لأغراض البحث فقط وفقاً لمتطلبات لجنة أخلاقيات البحث. مشاركتك محل التقدير، شكرًا لك.

لمزيد من المعلومات، يمكنك الاتصال بـ:

محمد المالكي  
كلية الصحة العامة وطب المناطق الحارة  
جامعة جازان  
mjalmalki@jazanu.edu.sa

شكرًا جزيلاً.

دراسة مسحية مقطعية حول الرضا عن التدابير الوقائية لكوفيد-19 والالتزام بها ووجهات النظر تجاهها بين طلاب الصحة العامة في جازان ، المملكة العربية السعودية

1. هل أنت طالب صحة عامة بجامعة جازان بالمملكة العربية السعودية؟

1 ☐ نعم (من فضلك انتقل للسؤال التالي)

2 ☐ لا (بإمكانك التوقف هنا، شكرًا لك)

2. هل توافق على المشاركة في هذه الدراسة؟

1 ☐ نعم (من فضلك ابدأ الاستبانة من السؤال التالي)

2 ☐ لا (بإمكانك التوقف هنا، شكرًا لك)

الإجابة على كافة الأسئلة يمكننا من التحليل الجيد لبيانات هذه الاستبانة. نأمل الإجابة على جميع الأسئلة. شكرًا لك.

### الجزء الأول: معلومات أساسية

3. جنسك؟

1 ☐ ذكر

2 ☐ أنثى

4. عمرك؟ (\_\_\_\_\_)

5. تخصصك الدراسي؟

1 ☐ الوبائيات

2 ☐ التثقيف وتعزيز الصحي

3 ☐ المعلوماتية الصحية

6. مستواك الدراسي في الكلية؟

1 ☐ السنة الدراسية الثانية (المستويات 3 و 4)

2 ☐ السنة الدراسية الثالثة (المستويات 5 و 6)

3 ☐ السنة الدراسية الأخيرة (المستويات 7 و 8)

7. هل أصبت بكوفيد-19؟

1 ☐ نعم

2 ☐ لا

دراسة مسحية مقطعية حول الرضا عن التدابير الوقائية لكوفيد-19 والالتزام بها ووجهات النظر تجاهها بين طلاب الصحة العامة في جازان ، المملكة العربية السعودية

**الجزء الثاني: وجهة نظر المشاركين تجاه التنظيم والتعامل، وجهة نظر المشاركين تجاه الإجراءات الوقائية المطبقة، الالتزام الشخصي بالإجراءات الوقائية، مستوى الرضا العام عن التدابير الوقائية لكوفيد-19**

(عند الإجابة على الخيارات فكر في أداء الكلية التي تدرس بها خلال امتحانات منتصف الفصل الدراسي الحالي.)

**8. وجهة نظر المشاركين تجاه التنظيم والتعامل:**

| موافق بشدة               | موافق                    | محايد                    | غير موافق                | غير موافق بشدة           |
|--------------------------|--------------------------|--------------------------|--------------------------|--------------------------|
| <input type="checkbox"/> |
|                          |                          |                          |                          |                          |
| <input type="checkbox"/> |
|                          |                          |                          |                          |                          |
| <input type="checkbox"/> |
|                          |                          |                          |                          |                          |

توجد إجراءات صحية للكشف عن أعراض كورونا المستجد (كوفيد-19) عند الدخول إلى مرافق الكلية.  
يتم استقبال الطلاب بطريقة منظمة.  
عند وجود مشكلة أو مخاوف تتعلق بكوفيد-19، أعرف تمامًا كيف أتصرف وبمن أتواصل داخل الكلية للحصول على الدعم.

**9. وجهة نظر المشاركين تجاه الإجراءات الوقائية من كوفيد-19 المطبقة في الكلية:**

| موافق بشدة               | موافق                    | محايد                    | غير موافق                | غير موافق بشدة           |
|--------------------------|--------------------------|--------------------------|--------------------------|--------------------------|
| <input type="checkbox"/> |
|                          |                          |                          |                          |                          |
| <input type="checkbox"/> |
|                          |                          |                          |                          |                          |
| <input type="checkbox"/> |
|                          |                          |                          |                          |                          |
| <input type="checkbox"/> |
|                          |                          |                          |                          |                          |
| <input type="checkbox"/> |
|                          |                          |                          |                          |                          |
| <input type="checkbox"/> |
|                          |                          |                          |                          |                          |
| <input type="checkbox"/> |
|                          |                          |                          |                          |                          |

يتقيد الموظفون بتدابير الوقاية مثل لبس الكمامات.  
يتقيد الطلاب بتدابير الوقاية مثل لبس الكمامات.  
يتم فحص حرارة الجميع بشكل فوري قبل دخول مرافق الكلية.  
يطلب من الجميع تطهير اليدين بالمطهرات الكحولية وليس الكمامات قبل دخول الكلية.  
تطبق المسافة الآمنة (2 متر) بين الأشخاص خلال الفرز وداخل مرافق الكلية.  
يوجد مكان مخصص لعزل الحالات المشتبه في إصابتها بكورونا المستجد (كوفيد-19).  
الكلية توفر وسائل الحماية الشخصية للطلاب وغيرهم، حسب الحاجة.  
تلقيت المعلومات والتعليمات المتعلقة بالوقاية من كوفيد-19 من قبل الكلية.

**10. ما هي أفضل المواد التوعوية التي قدمتها الكلية بخصوص كوفيد-19؟**

---



---



---



---



دراسة مسحية مقطعية حول الرضا عن التدابير الوقائية لكوفيد-19 والالتزام بها ووجهات النظر تجاهها بين طلاب الصحة العامة في جازان ، المملكة العربية السعودية

#### 11. الالتزام الشخصي بالإجراءات الوقائية من كوفيد-19 داخل مرافق الكلية:

| موافق<br>بشدة            | موافق                    | محايد                    | غير موافق                | غير موافق<br>بشدة        |
|--------------------------|--------------------------|--------------------------|--------------------------|--------------------------|
| <input type="checkbox"/> |
| <input type="checkbox"/> |
| <input type="checkbox"/> |

أرتدي أدوات الوقاية الشخصية مثل لبس الكمام.

أغسل اليدين / أعقم اليدين بالمطهرات الكحولية وفق التوصيات.

أتقيد بإجراءات التباعد الاجتماعي.

#### 12. من وجهة نظركم، ما هي أهم أسباب عدم التزام الطلاب بالإجراءات الوقائية من كوفيد-19 داخل مرافق الكلية؟

---



---



---



---

#### 13. مستوى الرضا العام عن التدابير الوقائية لكوفيد-19:

| موافق<br>بشدة            | موافق                    | محايد                    | غير موافق                | غير موافق<br>بشدة        |
|--------------------------|--------------------------|--------------------------|--------------------------|--------------------------|
| <input type="checkbox"/> |

أنا راض بشكل عام عن التدابير الوقائية لمواجهة كوفيد-19 المطبقة في الكلية خلال امتحانات منتصف الفصل الدراسي.

#### 14. من فضلك اذكر أهم ثلاث مبررات لرضاك / عدم رضاك عن الإجراءات الوقائية المطبقة في الكلية.

---



---



---



---

#### 15. في المساحة أدناه، فضلاً أكتب أي ملاحظات أو معلومات إضافية تعتقد أنها ستعزز من نتائج الدراسة.

---



---



---



---

شكراً لمشاركتك في هذه الاستبانة
